# Supplementary material for: Increased Metformin Clearance in Overweight and Obese Adolescents: A Pharmacokinetic Substudy of a Randomized Controlled Trial
Source: Springer Nature journal article supplement (doi:10.1007/s40272-018-0293-1), 2018-05-10
Supplement: MOESM1 [file 24128546]

# Increased Metformin Clearance in Overweight and Obese Adolescents: A Pharmacokinetic Substudy of a Randomized Controlled Trial

Anne van Rongen, Marloes P. van der Aa, Maja Matic, Ron H. N. van Schaik, Vera H. M. Deneer, Marja M. van der Vorst, Catherijne A. J. Knibbe.

Pediatric Drugs, 2018

Electronic Supplementary Material; Table 1

**Online Supplementary Table 1** Genotype results of the *OCT1* and *MATE1* transporter

| Gene                      | Genetic marker | Allele change      | WT (n) | HT (n) | HM (n) | MAF study (%) | MAF lit. <sup>a</sup> (%) | HW <sup>b</sup> (P) |
|---------------------------|----------------|--------------------|--------|--------|--------|---------------|---------------------------|---------------------|
| <i>SLC22A1</i><br>(OCT1)  | rs72552763     | GAT>del            | 16     | 6      | 0      | 14            | 15                        | 0.46                |
|                           | rs12208357     | 181C>T             | 17     | 5      | 0      | 11            | 7                         | 0.55                |
|                           | rs34130495     | 1201G>A            | 19     | 3      | 0      | 7             | 2                         | 0.73                |
|                           | rs34059508     | 1393G>A<br>GAT>del | 22     | 0      | 0      | 0             | 1                         | NA                  |
|                           | rs622342       | A>C                | 7      | 10     | 5      | 45            | 41                        | 0.70                |
| <i>SLC47A1</i><br>(MATE1) | rs2289669      | G>A                | 9      | 10     | 3      | 36            | 46                        | 0.93                |
|                           | rs10735        | G>A                | 14     | 8      | 0      | 18            | 16                        | 0.30                |

HT= heterozygous, HM= homozygous, MAF= minor allele frequencies, MATE1= multidrug and toxin extrusion transporter 1, OCT1= organic cation transporter 1, SLC= solute carrier family, WT= wild type

<sup>a</sup> MAF literature European

<sup>b</sup> Hardy-Weinberg equilibrium
