# Supplementary material for: Increased Metformin Clearance in Overweight and Obese Adolescents: A Pharmacokinetic Substudy of a Randomized Controlled Trial
Source: Springer Nature journal article supplement (doi:10.1007/s40272-018-0293-1), 2018-05-10

# Increased Metformin Clearance in Overweight and Obese Adolescents: A Pharmacokinetic Substudy of a Randomized Controlled Trial

Anne van Rongen, Marloes P. van der Aa, Maja Matic, Ron H. N. van Schaik, Vera H. M. Deneer, Marja M. van der Vorst, Catherijne A. J. Knibbe.

Pediatric Drugs, 2018

Electronic Supplementary Material; Figure 1

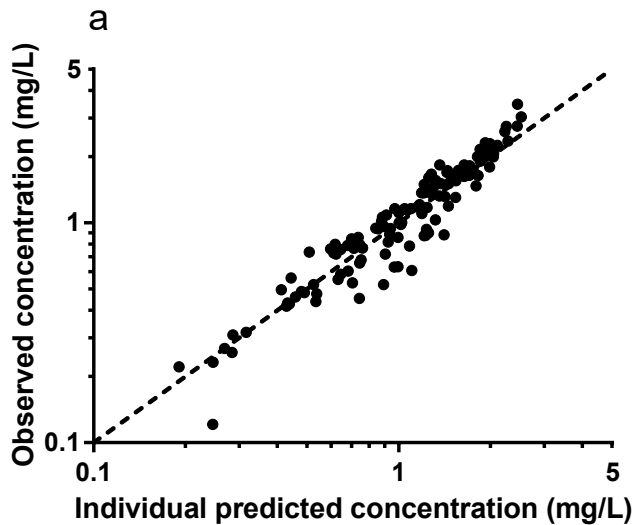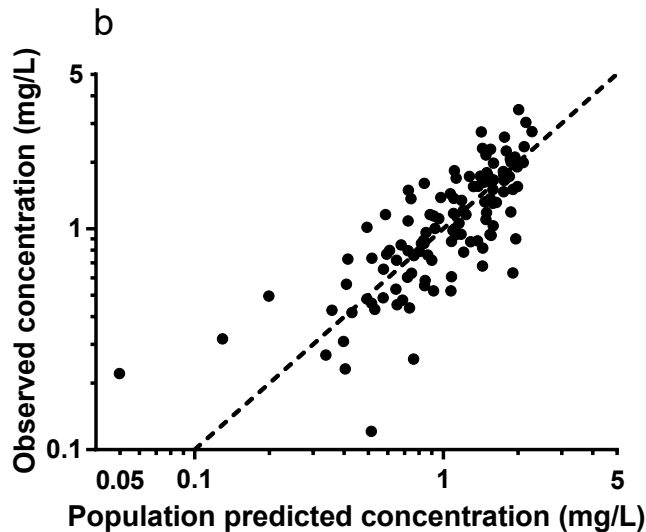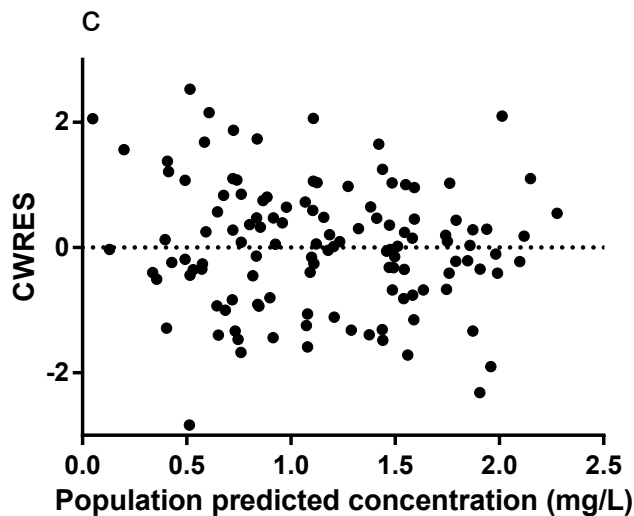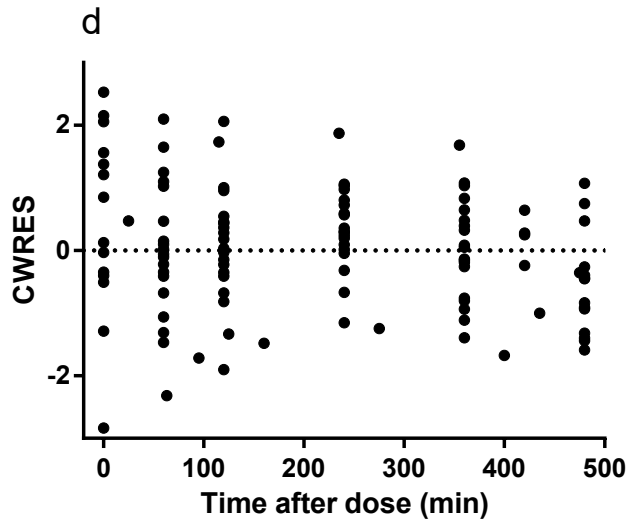

Supplement: MOESM2 [file 24128546]
